# Supplementary material for: Preference for and Discrimination of Paintings by Mice
Source: PLoS One. 2013 Jun 6;8(6):e65335. doi: 10.1371/journal.pone.0065335 (PMC3675127; doi:10.1371/journal.pone.0065335)
Supplement: Table S1 — List of paintings. (XLS) [file pone.0065335.s001.xls]

## Sheet: Sheet1
Experiment 1a,b	Kandinsky for preference test and CPP training	year	Kandinsky for test after CPP	year
	Composition VIII	1923	Accent in rose	1926
	A center	1924	On top	1928
	Yellow-red-blue	1925	Mondo blue	1934
	A few circle	1926	Accents delicats	1935
	Composition IX	1936	Movement I	1935
	Dominate curve	1936
	Various parties	1940
	Blue sky	1940
	Around the circle	1940
	Grants reciprocal	1942
	Mondrian for preference and CPP training	year	Mondrian for test after CPP	year
	Composition 6	1914	Composition with Grid 9; Checkerboard with Light Colors	1919
	Composition with Color Planes	1914	Composition with Black, Blue, Red, Yellow, and Gray	1920
	Composition in Color B	1917	Composition with Yellow, Black, Blue, Red, and Gray	1922
	Composition with Black, Red, Gray, Yellow, and Blue	1920	Composition of red and white I	1938
	Composition with Large Blue Plane, Red, Black, Yellow, and Gray	1921	Broadway boogie woogie	1942-1943
	Composition with Large Red Plane, Gray-Blue, Yellow, Black, and Blue	1922
	Composition with Black, Yellow, and Blue	1927
	New York City I	1941
	Composition (unfinished)	1943
	New York City III (unfinished)	1942
Experiment 1c,d	Picasso for preference and CPP training	year	Picasso for test after CPP	year
	Woman in a Yellow Armchair	1932	Girl Before a Mirror	1932
	Las Meninas, after Velazquez	1957	Jug and Bowl of Fruit	1931
	Guitar, Glass and Fruit Bowl	1924	Pitcher and Bowl of Fruit	1931
	Mandolin and Guitar	1924	The Yellow Belt: Marie-Therese Walter	1932
	Wine Bottle	1926	Fruit Bowl and Guitar	1932
	Painter and his model	1927
	Harlequin	1927
	Young Girl	1929
	The Open Window	1929
	Nude Standing by the Sea	1929
	Renoir for preference and CPP training	year	Renoir for test after CPP	year
	Rowers at Argenteuil	1873-4	Springtime (in Chatou),	1875
	Garden in the rue Cortot, Montmartre	1876	Rowers at Chatou	1880-1
	Women in a Garden	1876	The Comtesse de Pourtales	1877
	Madame Henriot	1876	Couple Reading	1877
	Reading Woman	1990	Young Girl with a Lace Hat	1891
	Madame Henriot	1876
	The Comtesse de Pourtales	1877
	Couple Reading	1877
	Young Girl with a Lace Hat	1891
	Seated Bather	1903-1906
Experiment 1e,f	Picasso for CPP training	year	Picasso for generalization test	year
	Guitar, Glass and Fruit Bowl	1924	Woman in a Yellow Armchair	1932
	Wine Bottle	1926	Las Meninas, after Velazquez	1957
	Harlequin	1927	Mandolin and Guitar	1924
	Young Girl	1929	Painter and his model	1927
	Nude Standing by the Sea	1929	The Open Window	1929
	Runoir for CPP training	year	Renoir for generalization test	year
	Rowers at Argenteuil	1873-4	Springtime (in Chatou),	1875
	Garden in the rue Cortot, Montmartre	1876	Rowers at Chatou	1880-1
	Women in a Garden	1876	The Comtesse de Pourtales	1877
	Madame Henriot	1876	Couple Reading	1877
	Reading Woman	1890	Young Girl with a Lace Hat	1891
Experiment 1g	Mixed painting set 1	year
	P:Nude Standing by the Sea	1929
	R:Rowers at Argenteuil	1873-4
	Mixed painting set 2	year
	P:Wine Bottle	1926
	R:Young Girl with a Lace Hat	1891
Experiment 2		year
Operant 1	K:Accord Reciproque	1942
	M:Composition with Black, Red, Gray, Yellow, and Blue	1920
Operant 2	K:A center	1924
	M:Composition with Large Blue Plane, Red, Black, Yellow, and Gray	1921
Operant 3	K:Monde blue	1934
	M:Composition with Grid 9; Checkerboard with Light Colors	1919
Operant 4	K:Accent in rose	1926
	M:Composition with Yellow, Blue, Black, Red, and Gray 1921	1921
Operant test	P:Nude Standing by the Sea	1929
	R:Couple Reading	1877
	K：Kandinsky, M:Mondrian, P:Picasso, R:Renoir
